# Supplementary material for: A window into extreme longevity; the circulating metabolomic signature of the naked mole-rat, a mammal that shows negligible senescence
Source: PubMed Central journal article supplement (PMC5964061; doi:10.1007/s11357-018-0014-2), 2018-04-20
Supplement: 11357_2018_14_MOESM1_ESM.pdf [file 11357_2018_14_MOESM1_ESM.pdf]

A.

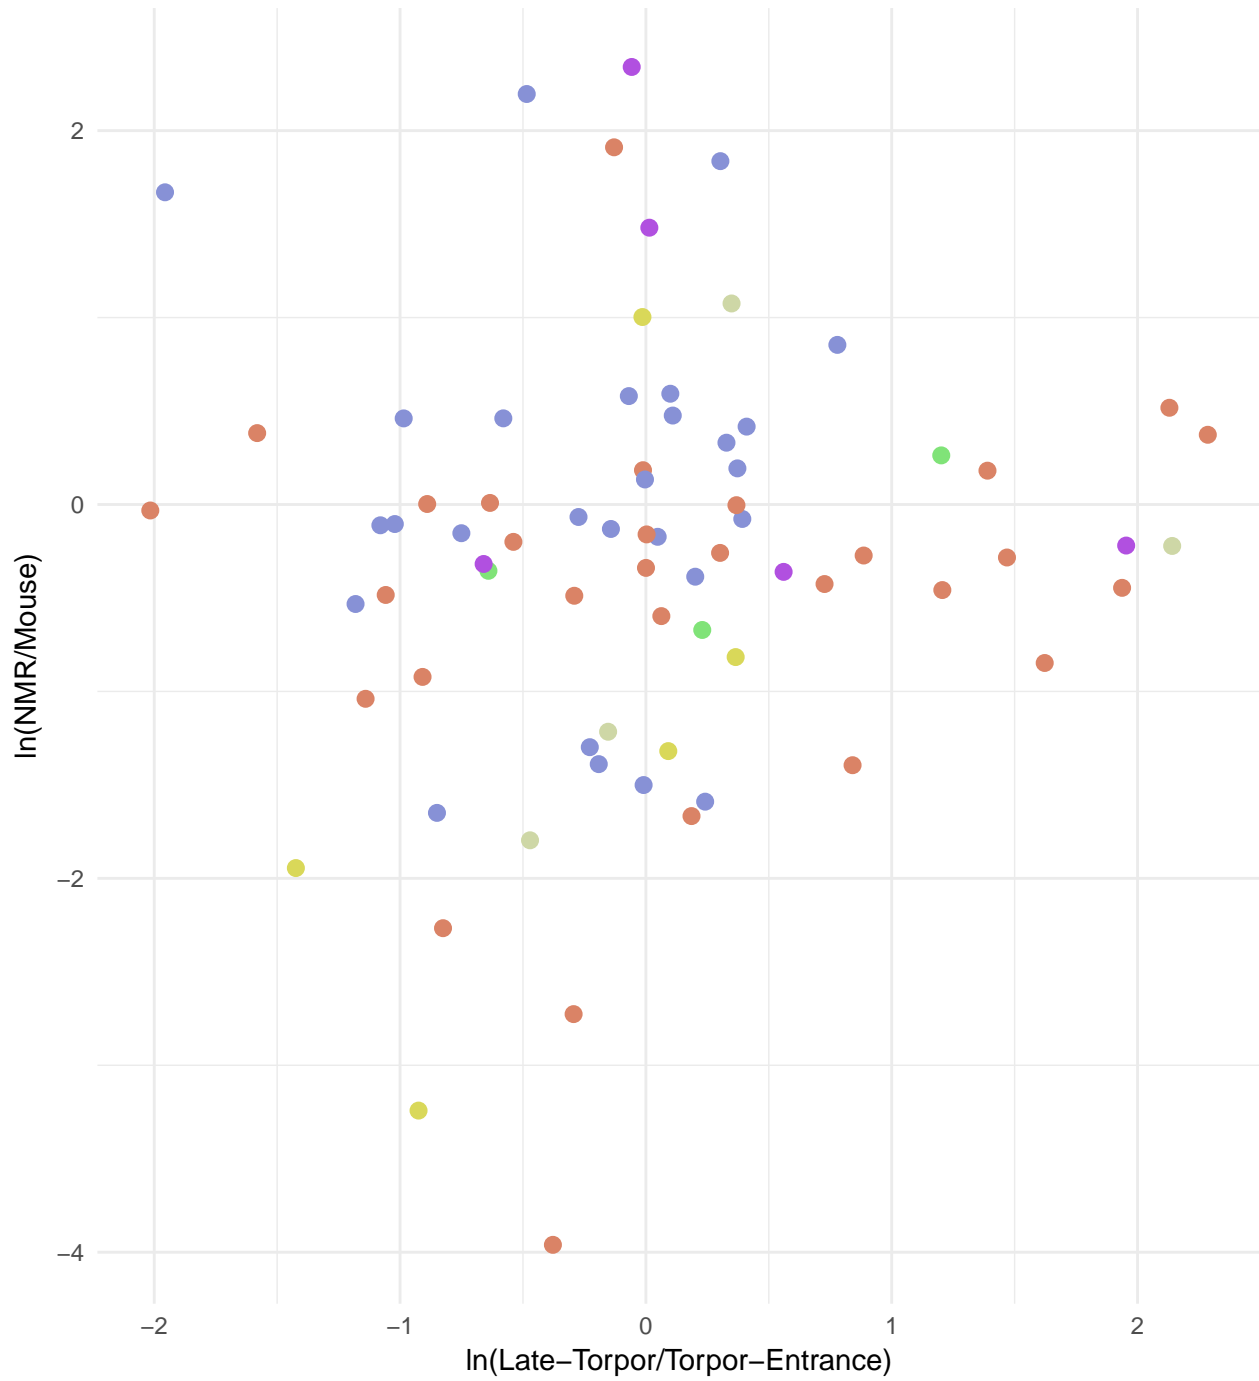

B.

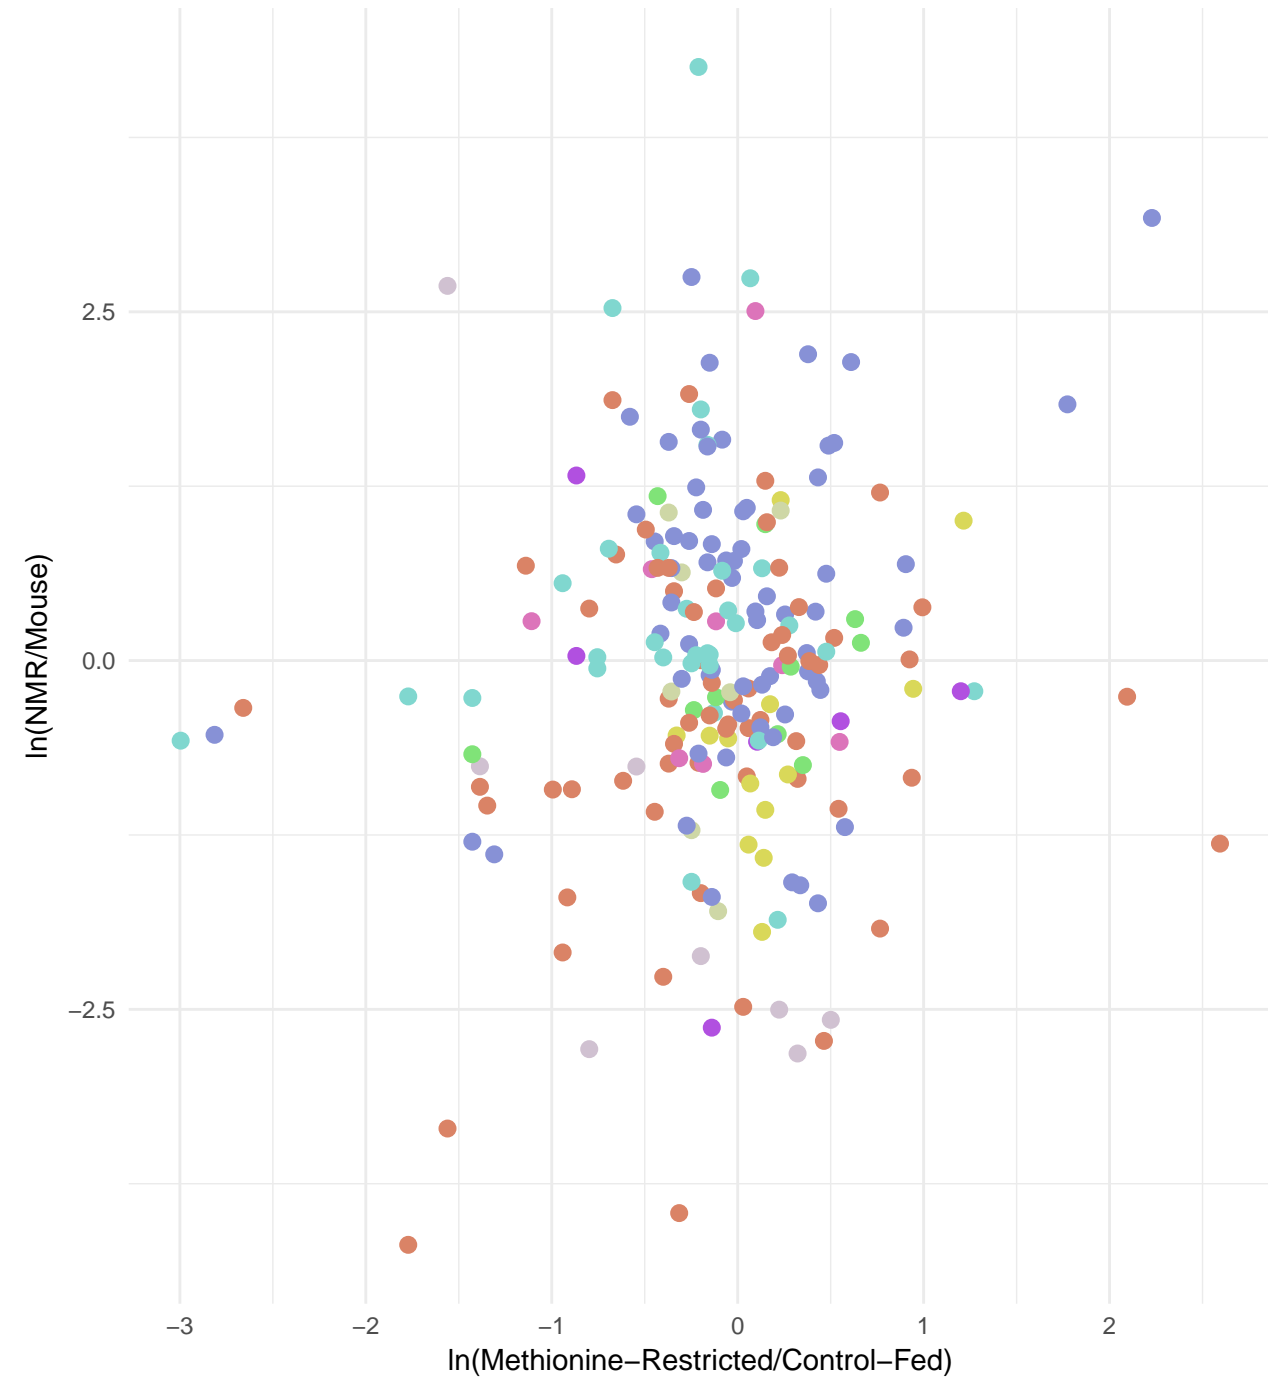

Super-Pathway

- Amino Acid
- Carbohydrate
- Cofactors and Vitamins
- Energy
- Lipid
- Nucleotide
- Peptide
- Xenobiotics
- Unknown
